# Supplementary material for: Metallic two-dimensional BP2: a high-performance electrode material for Li- and Na-ion batteries
Source: Royal Society of Chemistry journal article supplement (doi:10.1039/d0cp00187b), 2021-01-01
Supplement: d0cp00187b1.pdf [file d0cp00187b1.pdf]

## Supplementary Information

### **Metallic two-dimensional BP<sub>2</sub>: A high-performance electrode material for Li- and Na-ion batteries**

Xiao-Juan Ye, Jie Xu, Yan-Dong Guo, and Chun-Sheng Liu\*

College of Electronic and Optical Engineering & College of Microelectronics, Nanjing

University of Posts and Telecommunications, Nanjing 210023, China

\*E-mail: [csliu@njupt.edu.cn](mailto:csliu@njupt.edu.cn)

## I. Phonon density of states

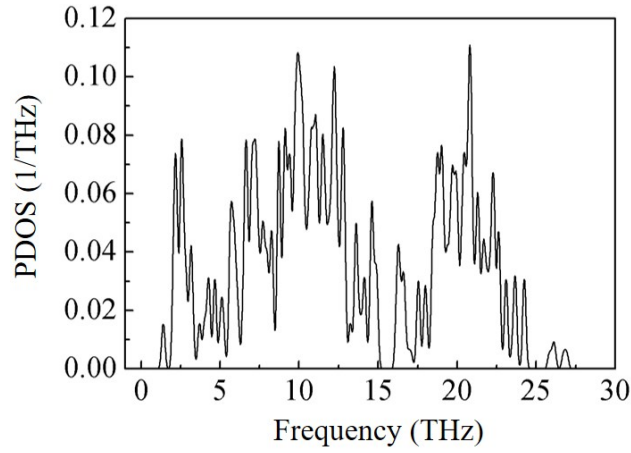

**Fig. S1** Phonon density of states of the BP<sub>2</sub> monolayer.

## II. Change of the total energy profile under uniaxial strains

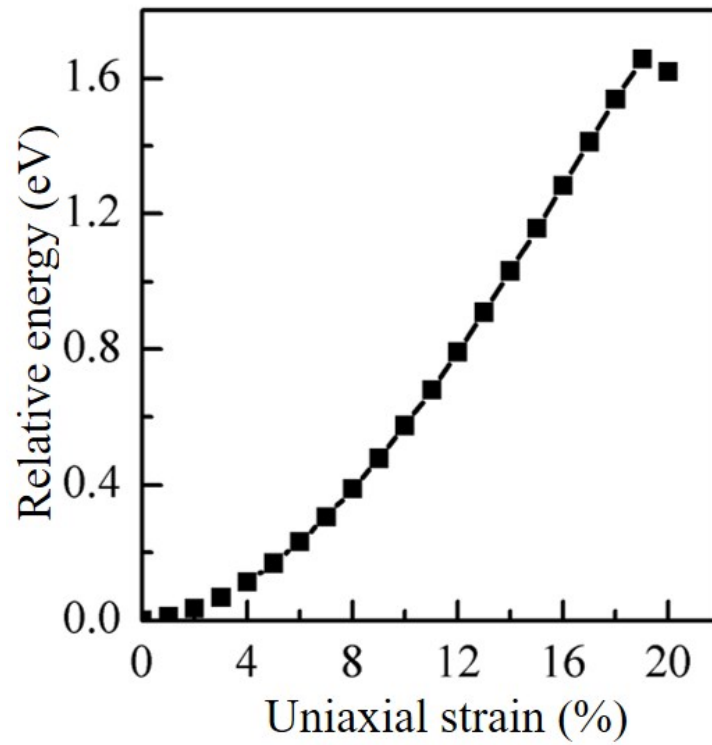

**Fig. S2** Change of the total energy profile with respect to tensile strain along the  $x$  direction. The trend with the tensile strain along  $y$  direction is the same as that along  $x$  direction.

### III. Phonon dispersion under uniaxial strains

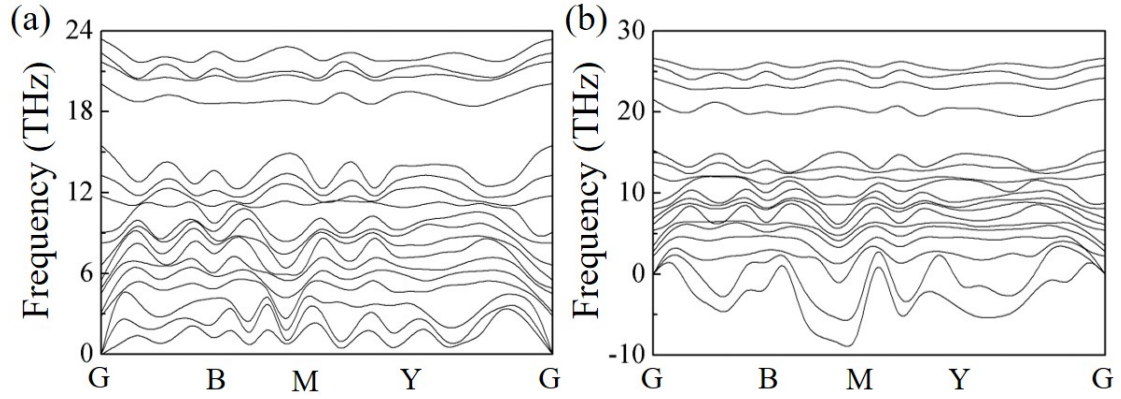

Fig. S3 Phonon dispersion of the BP<sub>2</sub> monolayer under the tensile strain of (a) 19% and (b) 20%.

### IV. The Hirshfeld charge for B/P atoms

Table S1. The electrons transferred from Li/Na to the neighboring B or P atoms.

|                                                                                     |        |               |                  |
|-------------------------------------------------------------------------------------|--------|---------------|------------------|
| 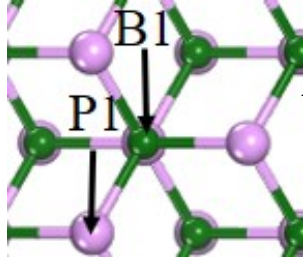  |        | $T_B$ (Li/Na) | $T_{P1}$ (Li/Na) |
|                                                                                     | B1 (e) | -0.13 / -0.13 | -0.12 / -0.12    |
|                                                                                     | P1 (e) | -0.02 / -0.03 | -0.02 / -0.03    |
|  |        | $H_2$ (Li/Na) | $T_{P2}$ (Li/Na) |
|                                                                                     | P2 (e) | -0.05 / -0.05 | -0.05 / -0.05    |
|                                                                                     | P3 (e) | 0.08 / 0.07   | 0.08 / 0.07      |

### V. The electrons for BP<sub>2</sub> back-donates to Li/Na

Table S2. The electrons for BP<sub>2</sub> back-donates to the empty Li-2*p* (Na-3*p*) orbitals.

|                   | $T_B$ | $T_{P1}$ | $H_2$ | $T_{P2}$ |
|-------------------|-------|----------|-------|----------|
| Li-2 <i>p</i> (e) | -0.23 | -0.19    | -0.18 | -0.16    |
| Na-3 <i>p</i> (e) | -0.07 | -0.06    | -0.02 | -0.02    |

## VI. The computing time for calculating the diffusion barrier

**Table S3.** The computing time (in minutes) for calculating the diffusion barrier of a Li (Na) atom on the monolayer BP<sub>2</sub> using LST/QST and NEB methods.

|                    | LST/QST | NEB  |
|--------------------|---------|------|
| Li-BP <sub>2</sub> | 3935    | 5005 |
| Na-BP <sub>2</sub> | 4392    | 5732 |
